# Supplementary material for: Antiviral Ability ofKalanchoe gracilisLeaf Extract against Enterovirus 71 and Coxsackievirus A16
Source: Hindawi journal article supplement (doi:10.1155/2012/503165), 2012-01-01
Supplement: f1 [file 503165.f1.pdf]

Supplemental Fig.1.

**A.**

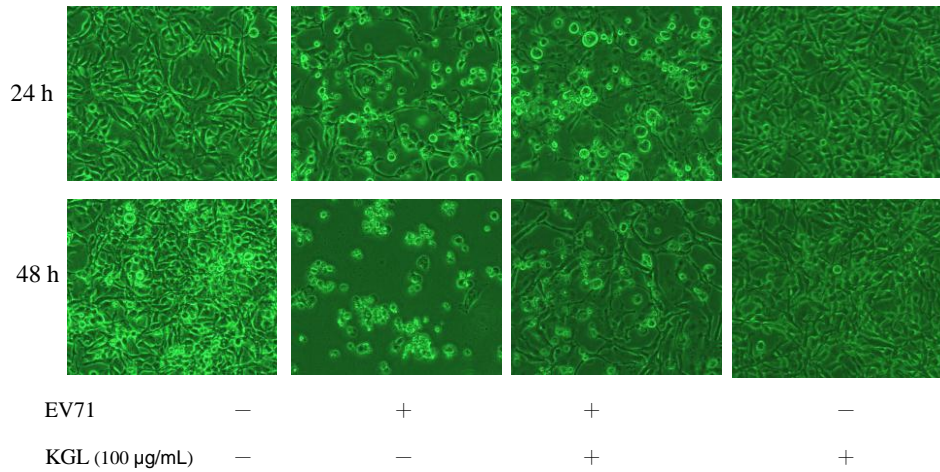

Supplemental Fig.1.

**B.**

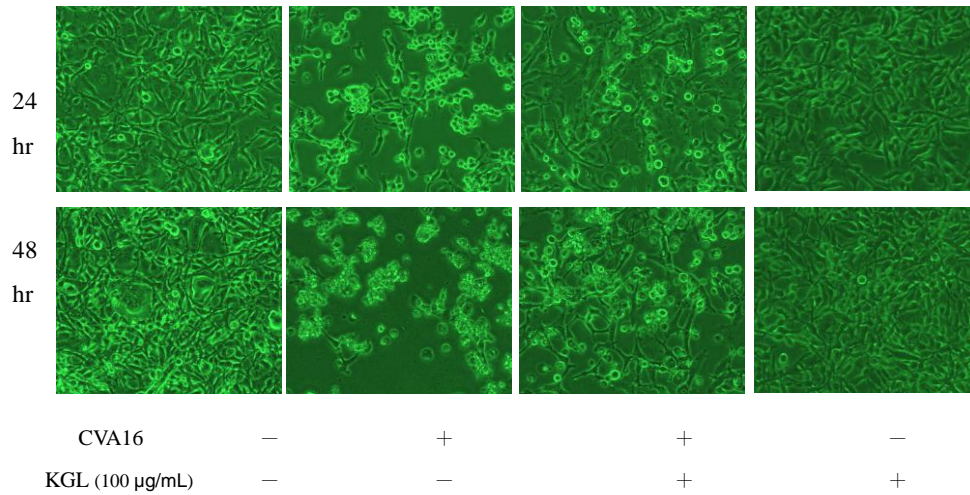

**Supplemental Fig. 1. Reduction of cytopathic effects by *K. gracilis* leaf extract.** The morphology of RD cells infected with EV71 (A) or CVA16 (B) were observed for the effect of *K. gracilis* leaf extract in CPE reduction assay. EV71 and CVA16 at the MOI of 1 was each mixed with *K. gracilis* leaf extract, and then added into RD cell cultures. Incubated RD cells were observed and photographed under microscopy 24- and 48-h post infection.

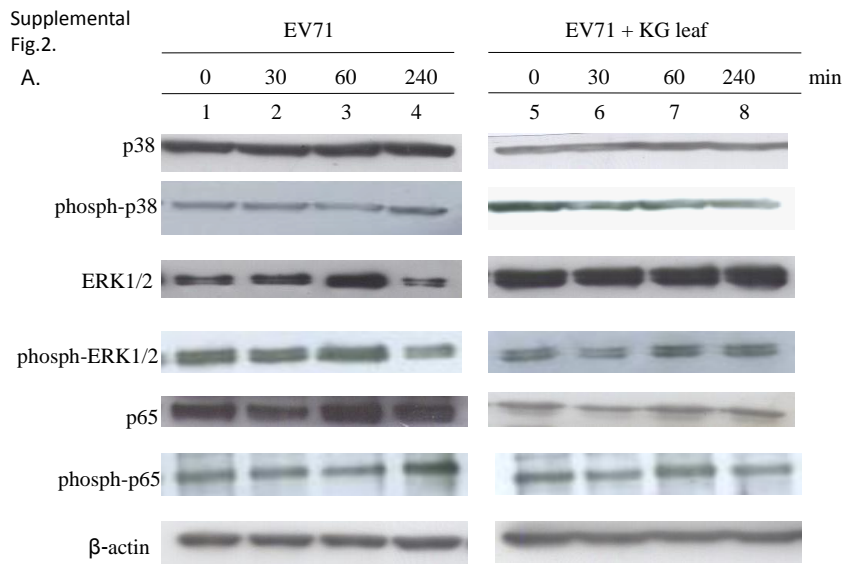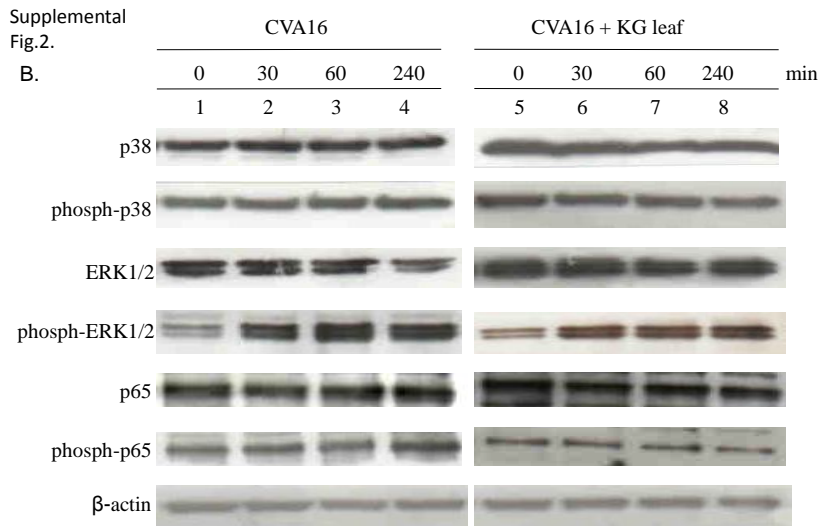

**Supplemental Fig. 2 Phosphorylation of p38 MAPK, ERK1/2 and NF- $\kappa$ B p65 in infected RD cells with or without the treatment of *K. gracilis* leaf extract.** RD cells were infected with EV71 (A) or CVA16 (B) and simultaneously treated with *K. racilis* leaf extract at a concentration of 50  $\mu$ g/ml. The cells were harvested at 0-, 30-, 60- and 240 min post infection, and Western blotting analysis was performed as described in the Materials and Methods section.

Supplemental Fig. 3

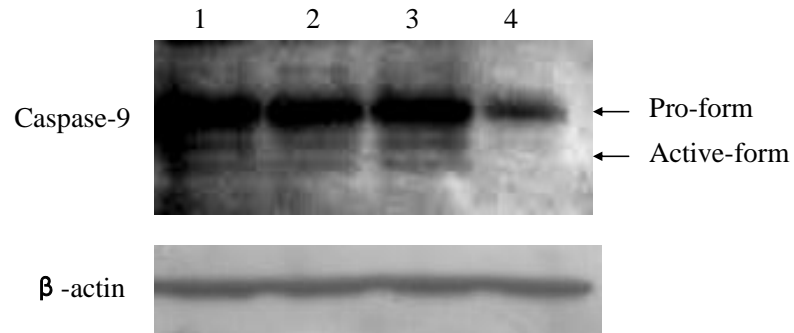

**Supplemental Fig. 3. Western blotting of caspase 9 in EV71-infected RD cells with or without the treatment of *K. gracilis* leaf extract.** RD cells were infected with EV71 at a MOI of 1 in the absence (Lane 1) and presence of *K. gracilis* leaf extract at concentrations of 10, 50 and 100  $\mu\text{g/ml}$  (Lanes 2-4). The cells were harvested 1 day post infection, and Western blotting analysis was performed as described in the Materials and Methods section.

**Supplemental Table 1.** Virus loads in pooled intestines from EV71-inoculated suckling mice with or without treatment of *K. gracilis* leaf extract

| Group       | Day 2<br>(pfu/ml) | Day 4<br>(pfu/ml) | Day 6<br>(pfu/ml) | Day 8<br>(pfu/ml) |
|-------------|-------------------|-------------------|-------------------|-------------------|
| 0 mg/Kg KGL | $3.7 \times 10^5$ | $3.1 \times 10^3$ | $2.8 \times 10^3$ | ND                |
| 1 mg/Kg KGL | $4.0 \times 10^5$ | $1.1 \times 10^3$ | ND                | ND                |
| 2 mg/Kg KGL | ND                | ND                | ND                | ND                |

KGL: *K. gracilis* leaf extract; ND: not detectable
